# Supplementary material for: Seasonal Pattern of Taxonomic Diversity and Functional Groups of Macro-Benthos from a Sub-Tropical Mangrove Estuary
Source: MDPI journal article supplement (doi:10.3390/jmse11071453), 2023-07-21
Supplement: s1 [file s1]

**Table S1.** Two-way ANOVA of water and sediment quality parameters of Pasur River estuary by sites and seasons. Significance is highlighted in bold.

| Variable                       | Factor        | D.f. | Sum of Squares | Mean Square | F       | p-value          |
|--------------------------------|---------------|------|----------------|-------------|---------|------------------|
| Temperature (°C)               | Season        | 2    | 448.09         | 224.04      | 880.13  | <b>&lt;0.001</b> |
|                                | Site          | 3    | 0.90           | 0.30        | 0.02    | 0.996            |
|                                | Season × Site | 6    | 1.80           | 0.30        | 1.27    | 0.310            |
| Transparency (cm)              | Season        | 2    | 1929.54        | 964.77      | 459.47  | <b>&lt;0.001</b> |
|                                | Site          | 3    | 65.61          | 21.87       | 0.36    | 0.781            |
|                                | Season × Site | 6    | 222.91         | 0.49        | 15.16   | 0.089            |
| Salinity (ppt)                 | Season        | 2    | 573.53         | 286.76      | 148.66  | <b>&lt;0.001</b> |
|                                | Site          | 3    | 60.99          | 20.33       | 1.13    | 0.352            |
|                                | Season × Site | 6    | 188.84         | 0.31        | 8.91    | 0.120            |
| pH                             | Season        | 2    | 0.99           | 0.50        | 21.43   | <b>&lt;0.001</b> |
|                                | Site          | 3    | 0.73           | 0.24        | 7.52    | <b>&lt;0.001</b> |
|                                | Season × Site | 6    | 0.00           | 0.00        | 0.52    | 0.789            |
| DO (mg/l)                      | Season        | 2    | 98.79          | 49.39       | 81.66   | <b>&lt;0.001</b> |
|                                | Site          | 3    | 18.58          | 6.19        | 1.98    | 0.137            |
|                                | Season × Site | 6    | 25.77          | 0.13        | 4.95    | 0.092            |
| Alkalinity (mg/l)              | Season        | 2    | 14913.64       | 7456.82     | 19.45   | <b>&lt;0.001</b> |
|                                | Site          | 3    | 12280.51       | 4093.50     | 8.57    | <b>&lt;0.001</b> |
|                                | Season × Site | 6    | 148.70         | 24.78       | 2.68    | 0.039            |
| TDS (mg/l)                     | Season        | 2    | 17980.85       | 8990.43     | 17.01   | <b>&lt;0.001</b> |
|                                | Site          | 3    | 17013.27       | 5671.09     | 9.86    | <b>&lt;0.001</b> |
|                                | Season × Site | 6    | 69.28          | 11.55       | 0.78    | 0.593            |
| NO <sub>3</sub> -N (mg/l)      | Season        | 2    | 7.71           | 3.85        | 59.06   | <b>&lt;0.001</b> |
|                                | Site          | 3    | 2.03           | 0.68        | 2.77    | 0.058            |
|                                | Season × Site | 6    | 0.06           | 0.01        | 4.39    | 0.064            |
| PO <sub>4</sub> -P (mg/l)      | Season        | 2    | 22.95          | 11.47       | 83.15   | <b>&lt;0.001</b> |
|                                | Site          | 3    | 4.37           | 1.46        | 2.01    | 0.132            |
|                                | Season × Site | 6    | 0.09           | 0.02        | 3.58    | 0.081            |
| Sand (%)                       | Season        | 2    | 244.53         | 122.26      | 1193.75 | <b>&lt;0.001</b> |
|                                | Site          | 3    | 3.23           | 1.08        | 0.14    | 0.935            |
|                                | Season × Site | 6    | 0.05           | 0.01        | 2.12    | 0.09             |
| Silt (%)                       | Season        | 2    | 394.52         | 197.26      | 1887.88 | <b>&lt;0.001</b> |
|                                | Site          | 3    | 3.19           | 1.06        | 0.09    | 0.967            |
|                                | Season × Site | 6    | 0.18           | 0.03        | 9.49    | 0.00             |
| Clay (%)                       | Season        | 2    | 635.74         | 317.87      | 792.56  | <b>&lt;0.001</b> |
|                                | Site          | 3    | 12.84          | 4.28        | 0.22    | 0.885            |
|                                | Season × Site | 6    | 0.07           | 0.01        | 0.80    | 0.58             |
| Organic matter (%)             | Season        | 2    | 62.74          | 31.37       | 355.20  | <b>&lt;0.001</b> |
|                                | Site          | 3    | 2.79           | 0.93        | 0.47    | 0.702            |
|                                | Season × Site | 6    | 0.04           | 0.01        | 1.78    | 0.15             |
| Density (ind./m <sup>2</sup> ) | Season        | 2    | 1457246        | 728623.03   | 143.55  | <b>&lt;0.001</b> |
|                                | Site          | 3    | 32621.64       | 10873.88    | 2.14    | 0.121            |
|                                | Season × Site | 6    | 24918.61       | 4153.10     | 0.82    | 0.567            |
| No. of species                 | Season        | 2    | 2172.72        | 1086.36     | 196.53  | <b>&lt;0.001</b> |
|                                | Site          | 3    | 742.08         | 247.36      | 44.75   | 0.152            |
|                                | Season × Site | 6    | 15.50          | 2.58        | 0.47    | 0.826            |
| Shannon-wiener diversity index | Season        | 2    | 0.85           | 0.43        | 40.68   | <b>&lt;0.001</b> |
|                                | Site          | 3    | 1.87           | 0.62        | 59.52   | 0.110            |
|                                | Season × Site | 6    | 0.10           | 0.02        | 1.51    | 0.219            |
| Pioelu's evenness index        | Season        | 2    | 0.40           | 0.20        | 35.60   | <b>&lt;0.001</b> |
|                                | Site          | 3    | 0.12           | 0.04        | 7.04    | 0.081            |
|                                | Season × Site | 6    | 0.06           | 0.01        | 1.83    | 0.136            |
